# Supplementary material
Source: MDPI journal article supplement (https://www.mdpi.com/2075-4698/10/3/64)
Supplement: s1 [file s1]

## Story Bridge Survey

Thank you for responding to this survey evaluating the Story Bridge Program. The survey is an independent project of the College of Social Sciences and Public Policy at Florida State University. The objective of the survey is to learn about how arts and storytelling relates to community facilitation work. Your responses will be kept confidential. The survey should take about five minutes to complete. You may stop the survey at any time, if you feel that you would not like to participate. If you have any questions about the survey, please feel free to contact, Crystal Taylor, Ph.D., at (e) [cjtaylor@fsu.edu](mailto:cjtaylor@fsu.edu). Thank you for your time and interest in giving feedback on the Story Bridge Program.

If you understand the purpose of the survey, including the commitment to confidentiality, and would like to continue with this research, please click "I understand" and continue to the survey.  
☐ I understand.

If you would like to receive an anonymous summary report of this study, please enter your email address. \_\_\_\_\_

### Survey Questions

1. How many days did you participate in the Workshop? (Please check all the apply)

- ☐ Pre-Planning for the Workshop
- ☐ Play-in-a-Day (First day of the Workshop)
- ☐ Discussion (Second day of the Workshop)
- ☐ Prefer not to answer

2. What were your main reasons for attending the workshop? (Please write your answer in the space below.)

3. Did you receive any training or sharpen any skills during the workshop?

- a. If yes, please describe.
- b. If no, please describe what training would have been helpful.

4. What was your experience engaging with the Story Bridge staff facilitators?

- ☐ Very good
- ☐ Good
- ☐ Neither
- ☐ Bad
- ☐ Very Bad

5. What was your experience engaging with your peers?

- ☐ Very good
- ☐ Good
- ☐ Neither
- ☐ Bad
- ☐ Very Bad

6. What parts of the program were the most memorable for you personally? (Please write your answer in the space below)

7. Please describe any strengths of the Story Bridge Program. (Please write your answer in the space below)

8. How can the Story Bridge Program be improved? (Please write your answer in the space below)

9. When sharing my ideas and experiences, I felt \_\_\_\_\_ by others.

\_\_\_\_ Strongly encouraged

\_\_\_\_ Encouraged

\_\_\_\_ Neither

\_\_\_\_ Discouraged

\_\_\_\_ Strongly discouraged

10. By the end of participating in Story Bridge, I felt \_\_\_\_\_ in my ability to identify a clear set of community values that were discussed during the workshop.

\_\_\_\_ Very confident

\_\_\_\_ Somewhat confident

\_\_\_\_ Neither

\_\_\_\_ Somewhat uncertain

\_\_\_\_ Very uncertain

11. From your experience, Story Bridge was \_\_\_\_\_ for discussing community history.

\_\_\_\_ Very helpful

\_\_\_\_ Helpful

\_\_\_\_ Neither

\_\_\_\_ Unhelpful

\_\_\_\_ Very unhelpful

12. If given the opportunity, I would participate in a Story Bridge-type workshop again.

\_\_\_\_ Yes (Please describe.)

\_\_\_\_ No (Please describe)

13. Additional comments about the Story Bridge Program: (Please write your answer in the space below)

14. I identify my gender as:

\_\_\_\_ Male

\_\_\_\_ Female

\_\_\_\_ Other

\_\_\_\_ Prefer not to answer

15. I identify my ethnicity as:

- ☐ Hispanic or Latino or Spanish culture or origin
- ☐ Not Hispanic or Latino or Spanish culture or origin
- ☐ Prefer not to answer

16. I identify my race as: (Please select all that apply.)

- ☐ American Indian or Alaska Native
- ☐ Asian
- ☐ Black or African American
- ☐ Native Hawaiian or Other Pacific Islander
- ☐ White
- ☐ Prefer not to answer

17. What is your age group?

- ☐ Under 18
- ☐ 18–20
- ☐ 21–34
- ☐ 35–44
- ☐ 45–54
- ☐ 55–64
- ☐ 65–70
- ☐ 71 or older
- ☐ Prefer not to answer

18. What is the highest grade or year of school that you have completed?

- ☐ Some High School
- ☐ High School Graduate or GED
- ☐ Some College
- ☐ College
- ☐ Graduate School
- ☐ Prefer not to answer

19. What is your employment status?

- ☐ Professional/Self-Employed
- ☐ Mid-Range/White Collar
- ☐ Retired
- ☐ Clerical
- ☐ Skilled Labor
- ☐ Military
- ☐ Semi-Skilled Labor
- ☐ Unemployed
- ☐ Prefer not to answer

20. In an average month, give your best guess as to how many times you participate in workshops or volunteer activities. \_\_\_\_ (Please give a specific number)

21. Please describe your current housing. My home is:

\_\_\_\_ Owned by you or someone in your household with a mortgage or loan

\_\_\_\_ Owned by you or someone in your household free and clear (without a mortgage or loan)

\_\_\_\_ Rented

\_\_\_\_ Other (Please describe.)

\_\_\_\_ Prefer not to answer

22. Do you currently live on Lopez Island?

\_\_\_\_ Yes, a home within the Community Land Trust

\_\_\_\_ Yes, a home on Lopez Island outside of the Community Land Trust

\_\_\_\_ No (Please list your city or give a general location.)

\_\_\_\_ Prefer not to answer

a. If yes, please describe why decided to reside on the Lopez Island.

b. If no, please describe why you decided to reside outside of Lopez Island.
